# Supplementary material for: Tyrosine Nitroxidation Does Not Affect the Ability of α-Synuclein to Bind Anionic Micelles, but It Diminishes Its Ability to Bind and Assemble Synaptic-like Vesicles
Source: MDPI journal article supplement (doi:10.3390/antiox12061310), 2023-06-20
Supplement: s1 [file s1]

**Tyrosine Nitrooxidation Does Not Affect the Ability of  $\alpha$ -Synuclein to Bind Anionic Micelles, but It Diminishes Its Ability to Bind and Assemble Synaptic-like Vesicles**

Ana Belén Uceda <sup>1,2</sup>, Juan Frau <sup>1,2</sup>, Bartolomé Vilanova <sup>1,2</sup> and Miquel Adrover <sup>1,2,\*</sup>

- 1 Health Research Institute of the Balearic Islands (IdISBa), E-07120 Palma de Mallorca, Spain
- 2 Departament de Química, Universitat de les Illes Balears, Ctra. Valldemossa km 7.5, E-07122 Palma de Mallorca, Spain.

\*Correspondence to: Miquel Adrover

e-mail: miquel.adrover@uib.es

Tel.: +34-971-173491, Fax +34-971-173426

|                                                                  |      |
|------------------------------------------------------------------|------|
| 1. Structure predictions using CS-Rosetta.....                   | p.2  |
| 2. Supplementary Figures.....                                    | p.3  |
| 3. Supplementary Tables.....                                     | p.21 |
| 4. References associated with the Supplementary Information..... | p.22 |

## 1. Structure predictions using CS-Rosetta

The structural models of SDS-bound  $\alpha$ S-NO<sub>2</sub> were obtained from the backbone chemical shifts using the CS-Rosetta server (<https://csrosetta.bmr.b.wisc.edu/submit>). CS-Rosetta uses a chemical-shift-constrained modelling to create a protein structure based on the prediction of the backbone dihedral angles from the amino acid sequence and the analogy of the experimental chemical shifts with those of characterized stretches/structures derived from PDB [1]. The backbone chemical shifts (C <sub>$\alpha$</sub> , C <sub>$\beta$</sub> , C, N, H <sub>$\alpha$</sub> , and HN) were used as the input to generate 3,000 structural models for  $\alpha$ S-NO<sub>2</sub>. The C <sub>$\alpha$</sub> -root-mean-squared deviation (C <sub>$\alpha$</sub> -RMSD) was calculated for all the models with respect to the lowest-energy structure. The CS-Rosetta run was deemed successful when it achieved a C <sub>$\alpha$</sub> -RMSD of around 2 Å for non-flexible regions for the ten lowest-energy structures. In our calculations, homologous structures were excluded from the PDB search.

The lowest-energy model of  $\alpha$ S-NO<sub>2</sub> displayed the two  $\alpha$ -helices already described for the solution structures of the micelle-bound  $\alpha$ S [2,3]. Its N-terminal  $\alpha$ -helix (V3-E35) was also superimposable on the N-terminal  $\alpha$ -helix of the solution structures of  $\alpha$ S (PDB 1XQ8; C <sub>$\alpha$</sub> -RMSD 1.68 Å) ([3], C <sub>$\alpha$</sub> -RMSD 1.07 Å) (Fig. S18). Thus, we used this lowest-energy model of  $\alpha$ S-NO<sub>2</sub> to calculate the NMR solution structure of  $\alpha$ S-NO<sub>2</sub>.

## 2. Supplementary Figures

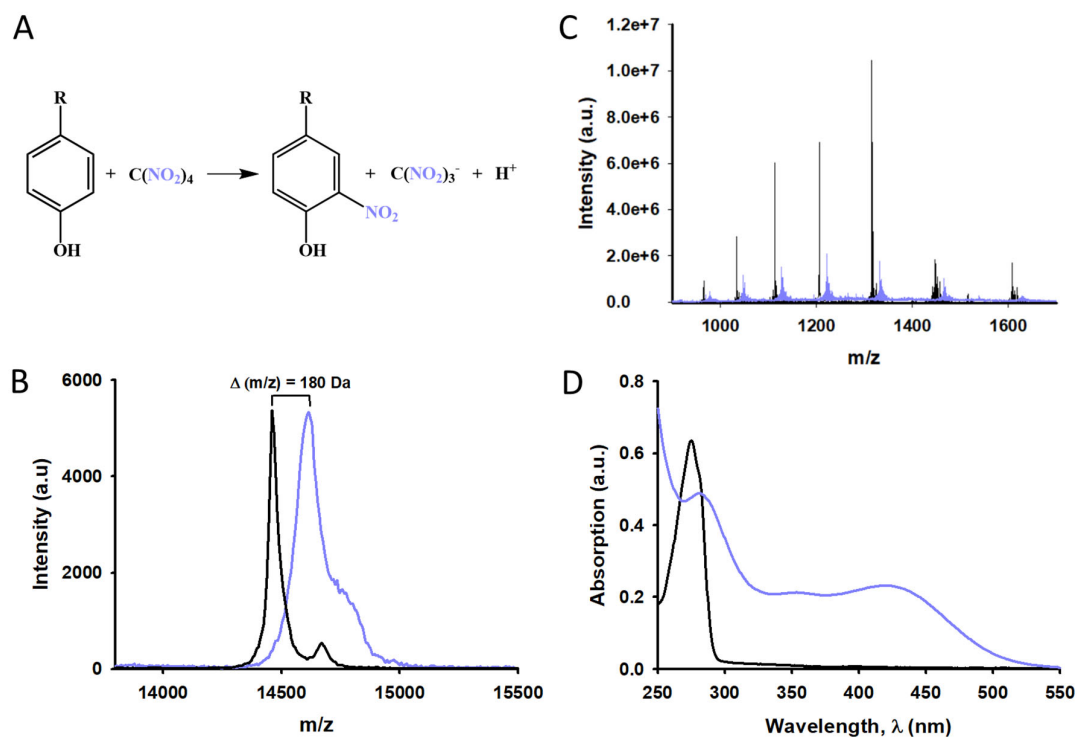

**Figure S1. Synthesis and characterization of  $\alpha\text{S-NO}_2$ .** **(A)** Scheme of the chemical reaction occurring upon incubation of Tyr with tetranitromethane (TNM). **(B)** Overlapping of the MALDI-TOF/TOF spectra of the native  $\alpha\text{S}$  (**black**) and the synthetic  $\alpha\text{S-NO}_2$  (**purple**). **(C)** HESI-Orbitrap mass spectrum of purified  $\alpha\text{S-NO}_2$  (**purple**) overlapped on that corresponding to the native  $\alpha\text{S}$  (**black**). The  $m/z$  signal corresponding to  $\alpha\text{S}$  shifted towards higher molecular weights. **(D)** Overlapping of the UV-Vis spectra of  $\alpha\text{S}$  (**black**) and  $\alpha\text{S-NO}_2$  (**purple**) collected at 25°C in a 20 mM phosphate buffer (pH 7.4) containing 150 mM NaCl.

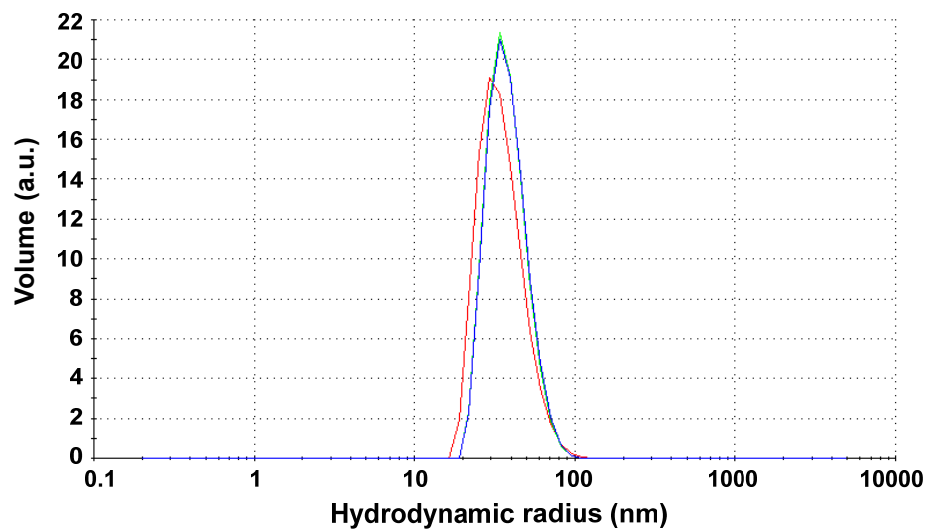

| SUV Composition | Hydrodynamic radius (nm) | Polydispersity index |
|-----------------|--------------------------|----------------------|
| DOPS            | 45.64 ± 12.77            | 0.101                |
| ESC             | 45.64 ± 13.01            | 0.076                |
| DOPC            | 45.64 ± 15.34            | 0.109                |

**Figure S2. Characterization of DOPS-, ESC-, and DOPC-SUVs by DLS measurements.** Size distribution profiles of 130  $\mu$ M DOPS- (*green*), ESC- (*blue*), and DOPC- SUVs (*red*) acquired at 25°C in a 20 mM phosphate buffer (pH 7.4) containing 150 mM NaCl. The DLS profiles were acquired just after the extrusion of the SUVs. The averaged hydrodynamic radius and the polydispersity index data of these SUVs are indicated in the table.

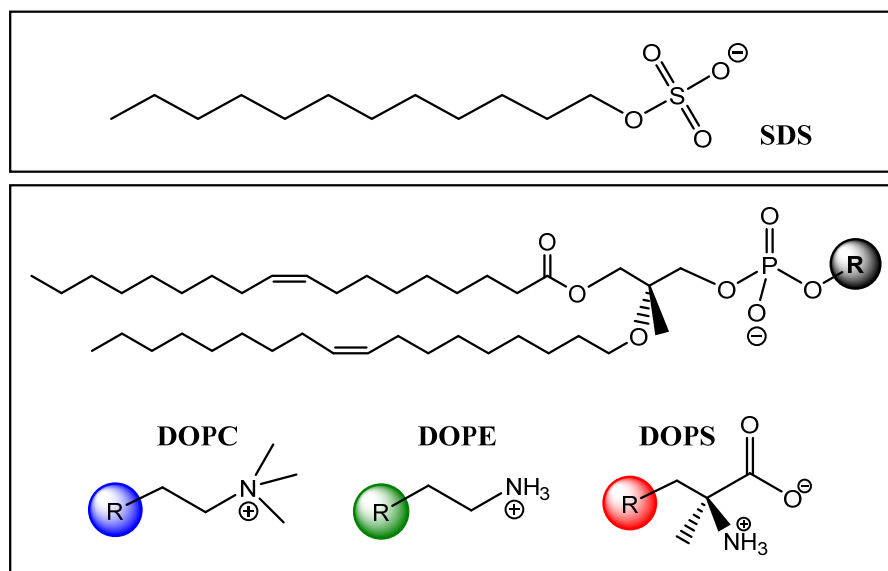

**Figure S3.** Chemical structures of SDS, DOPC, DOPE, and DOPS, which were the lipids used in this work to assemble the micelles and the different SUVs that we used to study the  $\alpha$ S-/ $\alpha$ S-NO<sub>2</sub>-lipid interactions.

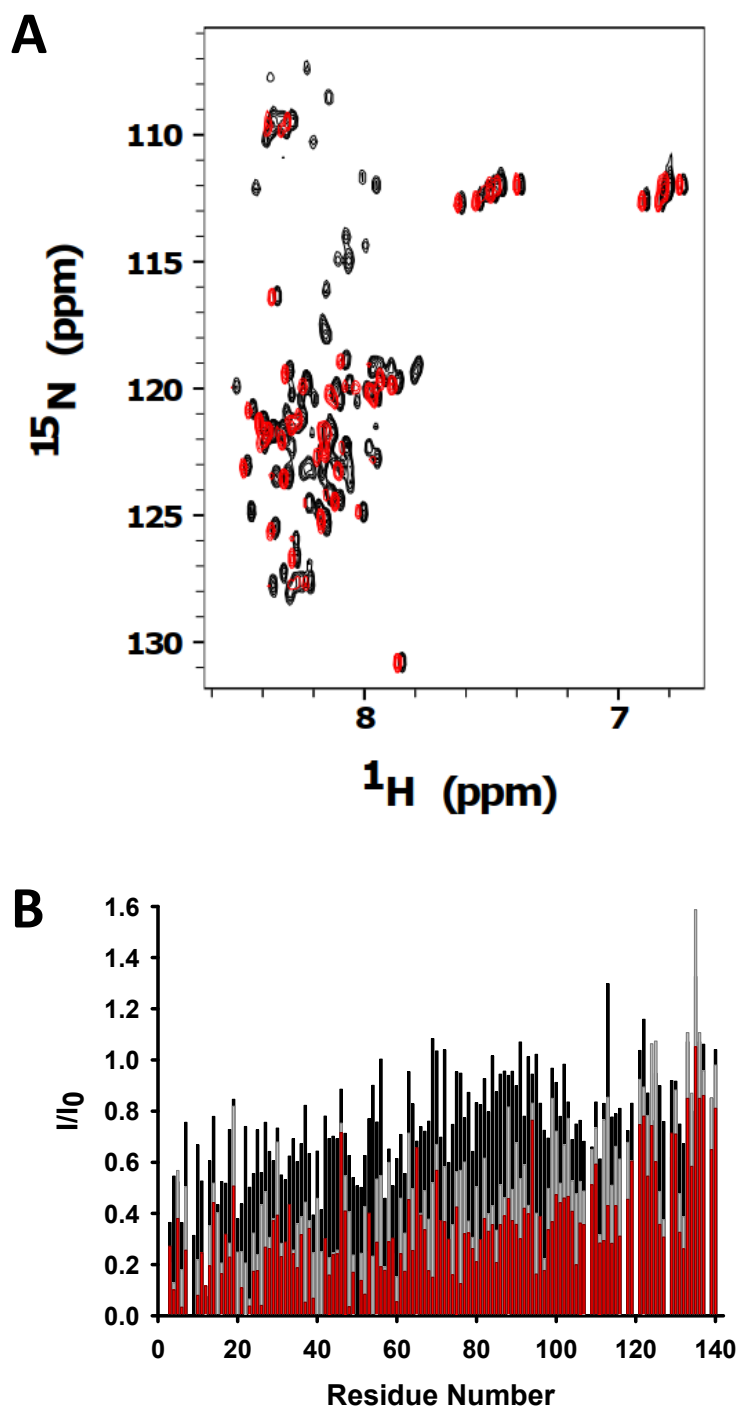

**Figure S4. Effect of the addition of ESC-SUVs on the  $^1\text{H}$ ,  $^{15}\text{N}$ -HSQC spectrum of aS.** **(A)** Overlapping of the  $^1\text{H}$ ,  $^{15}\text{N}$ -HSQC spectra of aS in the absence (**black**) and in the presence (**red**) of ESC-SUVs (1.3 mM). Experiments were acquired at 37°C in 20 mM phosphate buffer (pH 6.5). **(B)** Fractional signal attenuation of the  $^1\text{H}$ ,  $^{15}\text{N}$ -HSQC signals relative to lipid-free spectrum as a function of the residue number of aS (135  $\mu\text{M}$ ) in the presence of 250  $\mu\text{M}$  (**black**), 610  $\mu\text{M}$  (**grey**), and 1.3 mM (**red**) ESC-SUVs. The experiments were acquired at 12.5 °C in 20 mM phosphate buffer (pH 6.5).

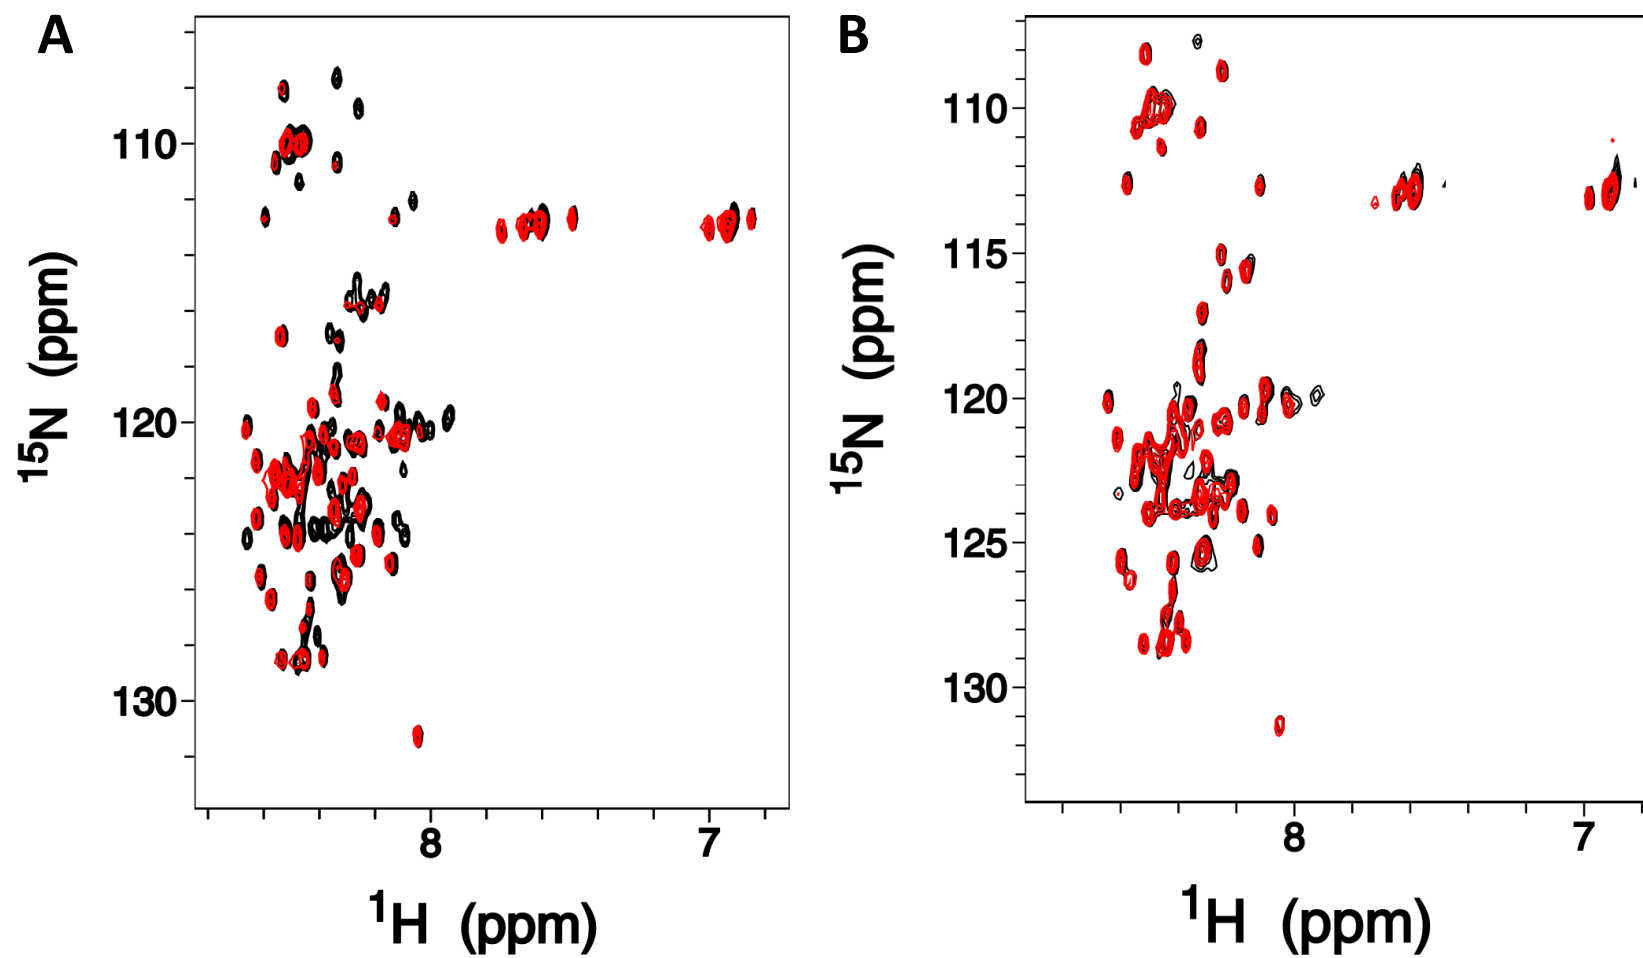

**Figure S5.** Overlapping of the  $^1\text{H}$ ,  $^{15}\text{N}$ -HSQC spectra obtained from solutions containing 135  $\mu\text{M}$   $\alpha\text{S}$  (A) or  $\alpha\text{S-NO}_2$  (B) in the absence (**black**) or in the presence (**red**) of 1.3 mM ESC-SUVs. Experiments were acquired at 12.5  $^\circ\text{C}$  in 20 mM phosphate buffer (pH 6.5).

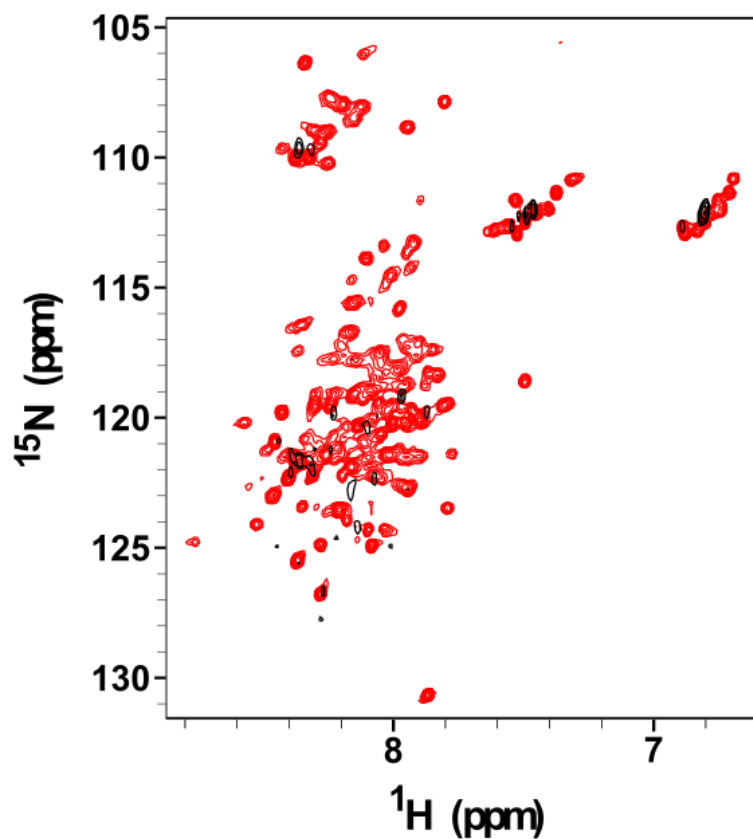

**Figure S6.** Overlapping of the  $^1\text{H}$ ,  $^{15}\text{N}$ -HSQC spectra of  $\alpha\text{S-NO}_2$  in the absence (**black**) or in the presence (**red**) of SDS micelles. Experiments were acquired in 20 mM phosphate buffer (pH 6.5) at 37°C. For visualization purposes, the intensity of the HSQC spectrum acquired in the absence of SDS (**black**) is ten-times higher than that of the HSQC spectrum acquired in the presence of SDS (**red**).



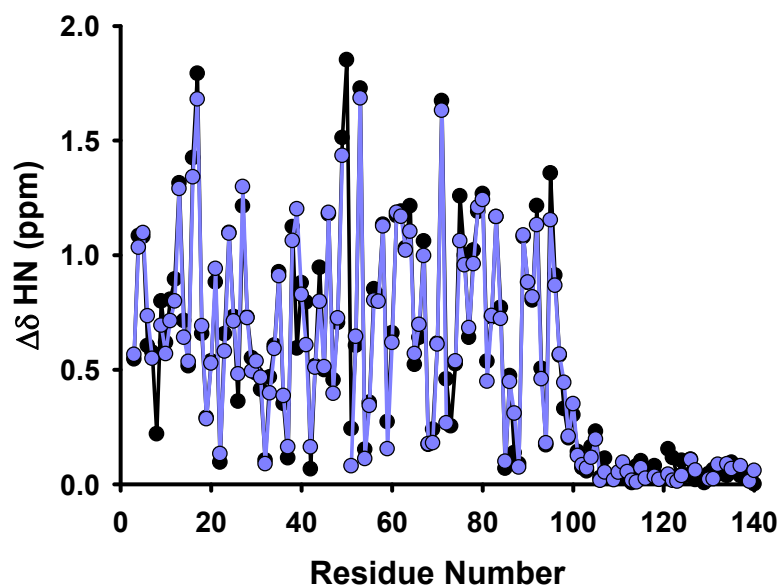

**Figure S7. Effect of 3-NT formation on the amide chemical shift perturbations of αS as a result of the presence of SDS micelles.** The amide chemical shift perturbations ( $\Delta\delta$ ) were calculated from the following equation:  $\Delta\delta = \sqrt{(\Delta\delta_{HN})^2 + x \cdot (\Delta\delta_N)^2}$ , where  $x$  is 0.2 for Gly and 0.14 for the other residues.  $\Delta\delta_{HN}$  and  $\Delta\delta_N$  are the amide proton and the amide nitrogen chemical shift differences obtained for αS (**black**) and αS-NO<sub>2</sub> (**purple**) in the presence and in the absence of SDS ( $\Delta\delta_x = \delta_{x,SDS} - \delta_{x,0}$ ).

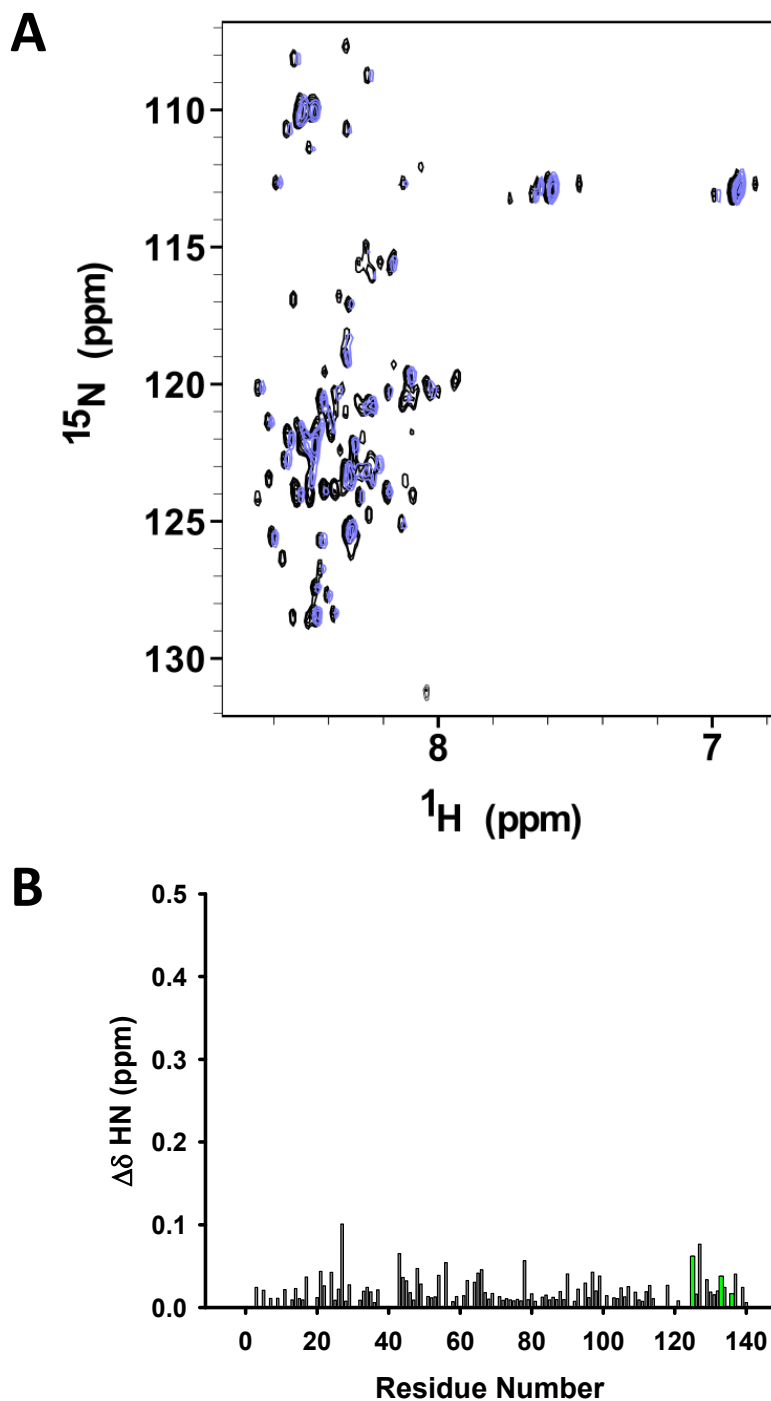

**Figure S8. Chemical shift perturbation of the monomeric unbound  $\alpha$ S as a result of Tyr nitration.** **(A)** Overlapping of the  $^1\text{H}$ ,  $^{15}\text{N}$ -HSQC spectra of  $\alpha$ S (**black**) and  $\alpha$ S- $\text{NO}_2$  (**purple**) collected in 20 mM phosphate buffer (pH 6.5) at 12.5 °C. **(B)** Effect of 3-NT formation on the amide chemical shifts of unbound  $\alpha$ S. The amide chemical shift perturbation ( $\Delta\delta$ ) was calculated from the following equation:  $\Delta\delta = \sqrt{(\Delta\delta_{\text{HN}})^2 + x \cdot (\Delta\delta_{\text{N}})^2}$ , where  $x$  is 0.2 for Gly and 0.14 for the other residues.  $\Delta\delta_{\text{HN}}$  and  $\Delta\delta_{\text{N}}$  are the amide proton and the amide nitrogen chemical shift differences between the unbound forms of  $\alpha$ S and  $\alpha$ S- $\text{NO}_2$  ( $\Delta\delta_x = \delta_{x,\alpha\text{SNO}_2} - \delta_{x,\alpha\text{S}}$ ). Values corresponding to nitrated Tyr are colored in **green**.

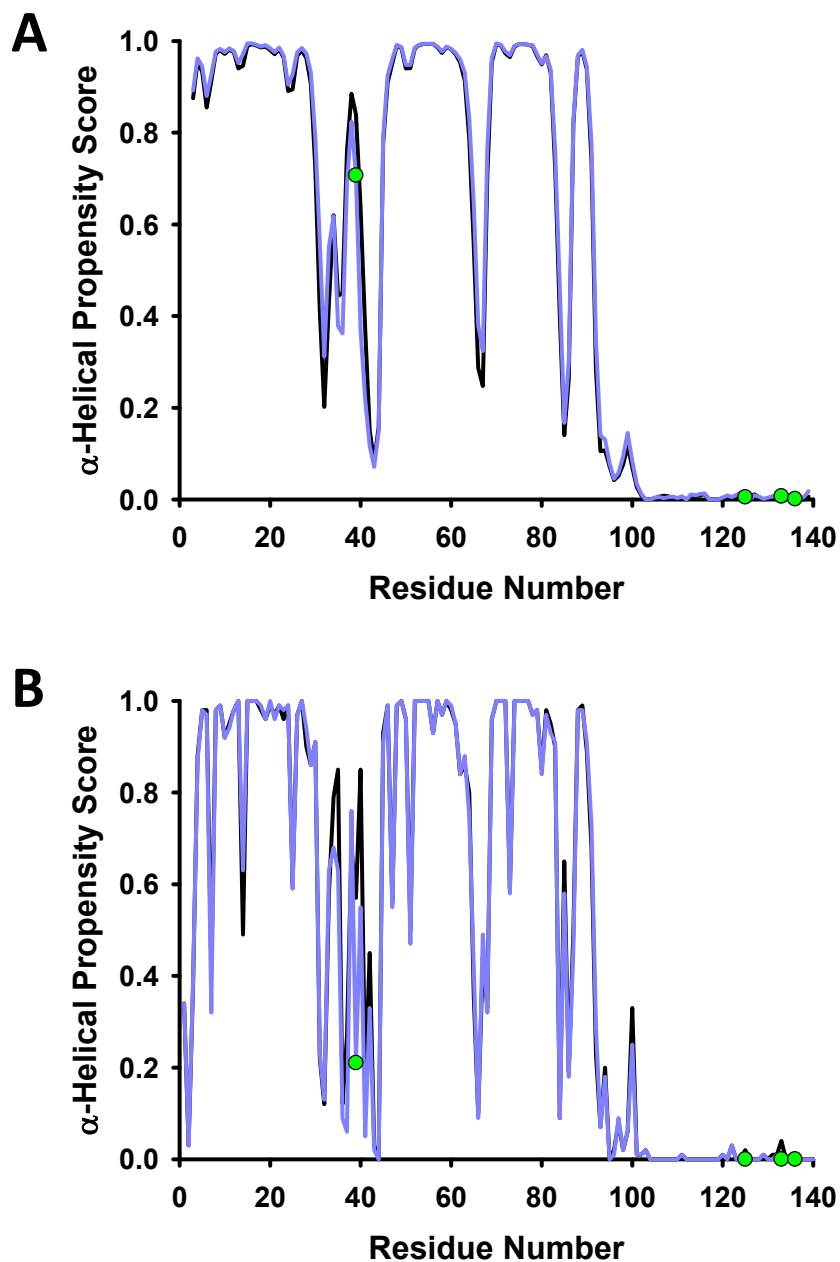

**Figure S9.**  $\alpha$ -helical propensity scores obtained for aS (**black**) and aS-NO<sub>2</sub> (**purple**) in the presence of SDS at 37 °C and at pH 6.5. The values displayed in Panel (**A**) were obtained using the Talos+ web server (<https://spin.niddk.nih.gov/bax/nmrserver/talos/>) and the corresponding H<sub>N</sub>, N, H <sub>$\alpha$</sub> , C <sub>$\alpha$</sub> , C <sub>$\beta$</sub> , and CO chemical shifts. The values shown in Panel (**B**) were obtained using the CSI3.0 web server (<http://csi3.wishartlab.com/cgi-bin/index.php>) and the H<sub>N</sub>, N, H <sub>$\alpha$</sub> , C <sub>$\alpha$</sub> , C <sub>$\beta$</sub> , and CO chemical shifts. In both panels, the positions of the 3-NT moieties along the sequence of aS-NO<sub>2</sub> are shown as **green** dots.

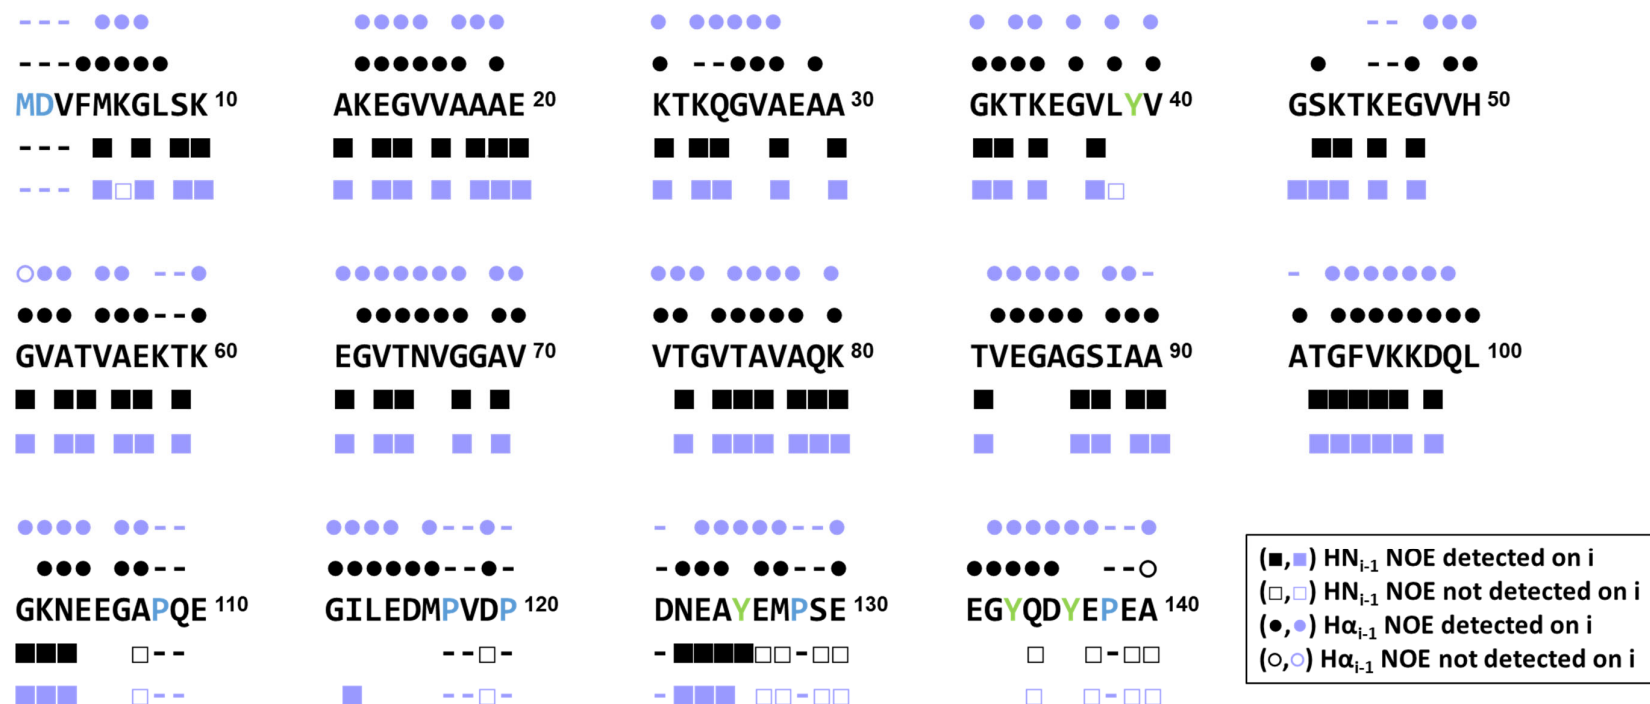

**Figure S10.** Primary sequence of  $\alpha$ S complemented with NOE patterns observed for  $\alpha$ S (**black**) and  $\alpha$ S-NO<sub>2</sub> (**purple**) in the presence of SDS, which are displayed on top (H $\alpha$ <sub>i-1</sub>/HN<sub>i</sub>; circles) and at the bottom (HN<sub>i-1</sub>/HN<sub>i</sub>; squares) of the sequence. Residues colored in blue were not included in the analysis of the sequential NOEs. Filled symbols display the residues for which the  $i$ -1th NOEs were detected. Empty symbols represent those residues for which  $i$ -1th NOE was not observed. The absence of a symbol indicates that it was not possible to determine whether it was an NOE or not since the signal of the  $i-1$  residue overlapped with that of the  $i$ th residue. The script (-) was used for those residues that could not be assigned in the <sup>1</sup>H,<sup>15</sup>N-NOESY spectra.

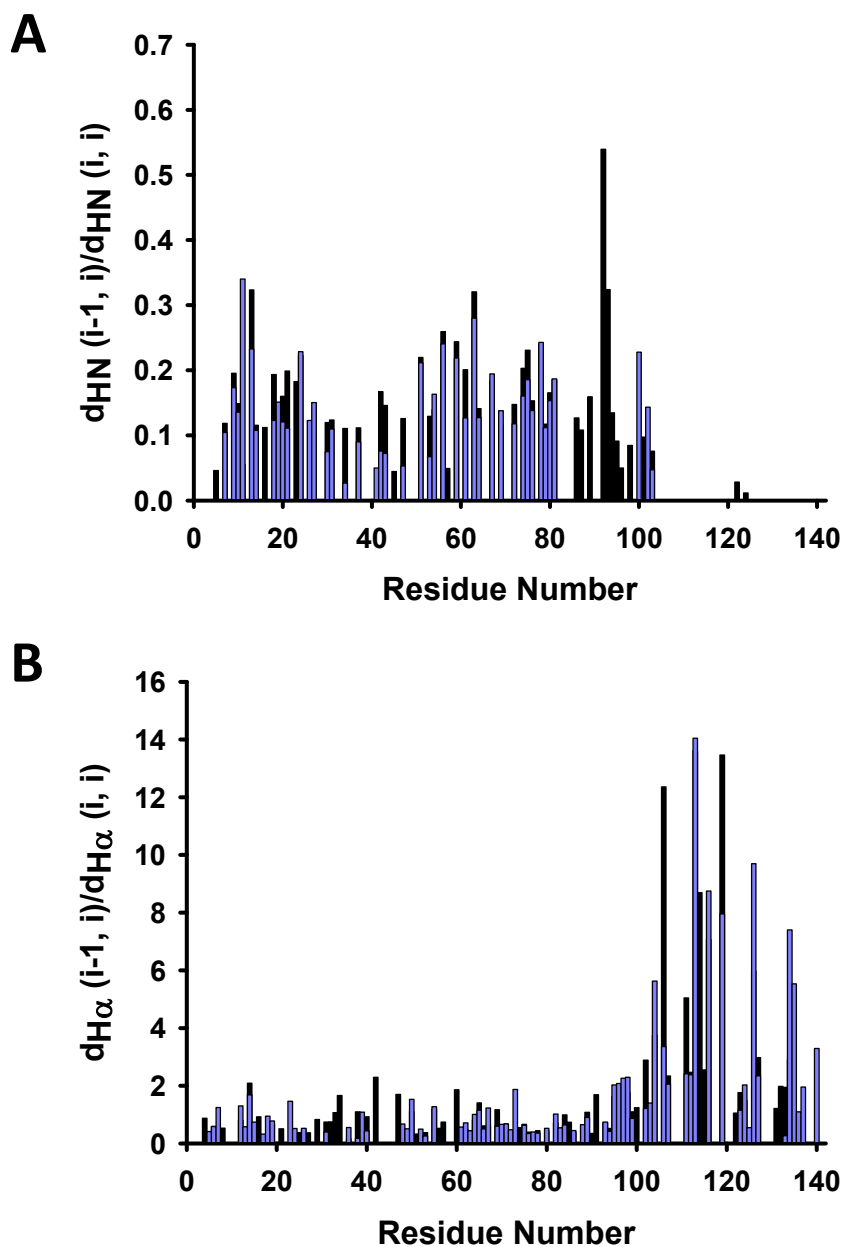

**Figure S11.** Sequential NOE intensity ratios for  $\alpha$ S (**black**) and  $\alpha$ S-NO<sub>2</sub> (**purple**) in the presence of SDS micelles. **(A)** Ratios of intraresidue to sequential H<sub>N</sub>-H<sub>N</sub> NOE intensities in  $\alpha$ S and  $\alpha$ S-NO<sub>2</sub>. For comparison purposes, the plots only display the values for those residues whose  $d_{NN}(i,i)/d_{NN}(i-1,i)$  values could be determined for  $\alpha$ S and  $\alpha$ S-NO<sub>2</sub>. **(B)** Ratios of intraresidue to sequential H <sub>$\alpha$</sub> -H<sub>N</sub> NOE intensities in  $\alpha$ S and  $\alpha$ S-NO<sub>2</sub>. The NOE intensities corresponding to Gly residues were divided by 2 to correct the presence of two H <sub>$\alpha$</sub>  atoms. For comparison purposes, the plots only display the values for those residues whose  $d_{\alpha N}(i,i)/d_{\alpha N}(i-1,i)$  values could be determined for  $\alpha$ S and for  $\alpha$ S-NO<sub>2</sub>.

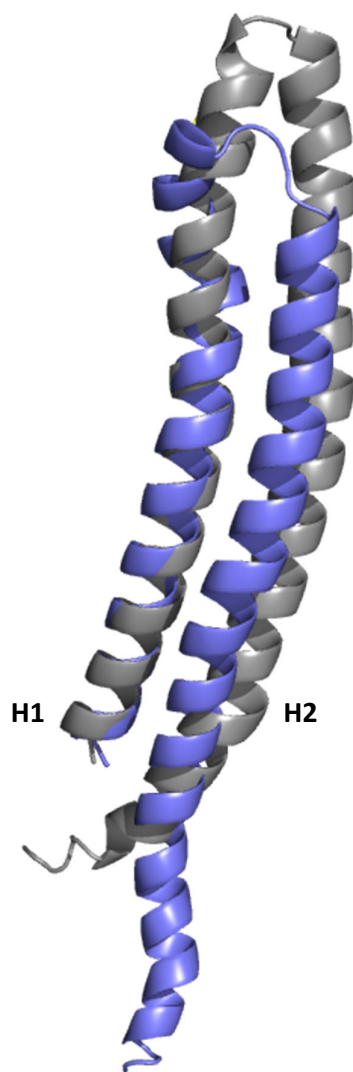

**Figure S12.** Structural alignment of the D2-G41 region of the average structures of SDS-bound  $\alpha$ S (*grey*) [3] and  $\alpha$ S-NO<sub>2</sub> (*purple*). The NMR solution structures were calculated using the PONDEROSA software. The disordered C-terminal domains were removed for visualization purposes.

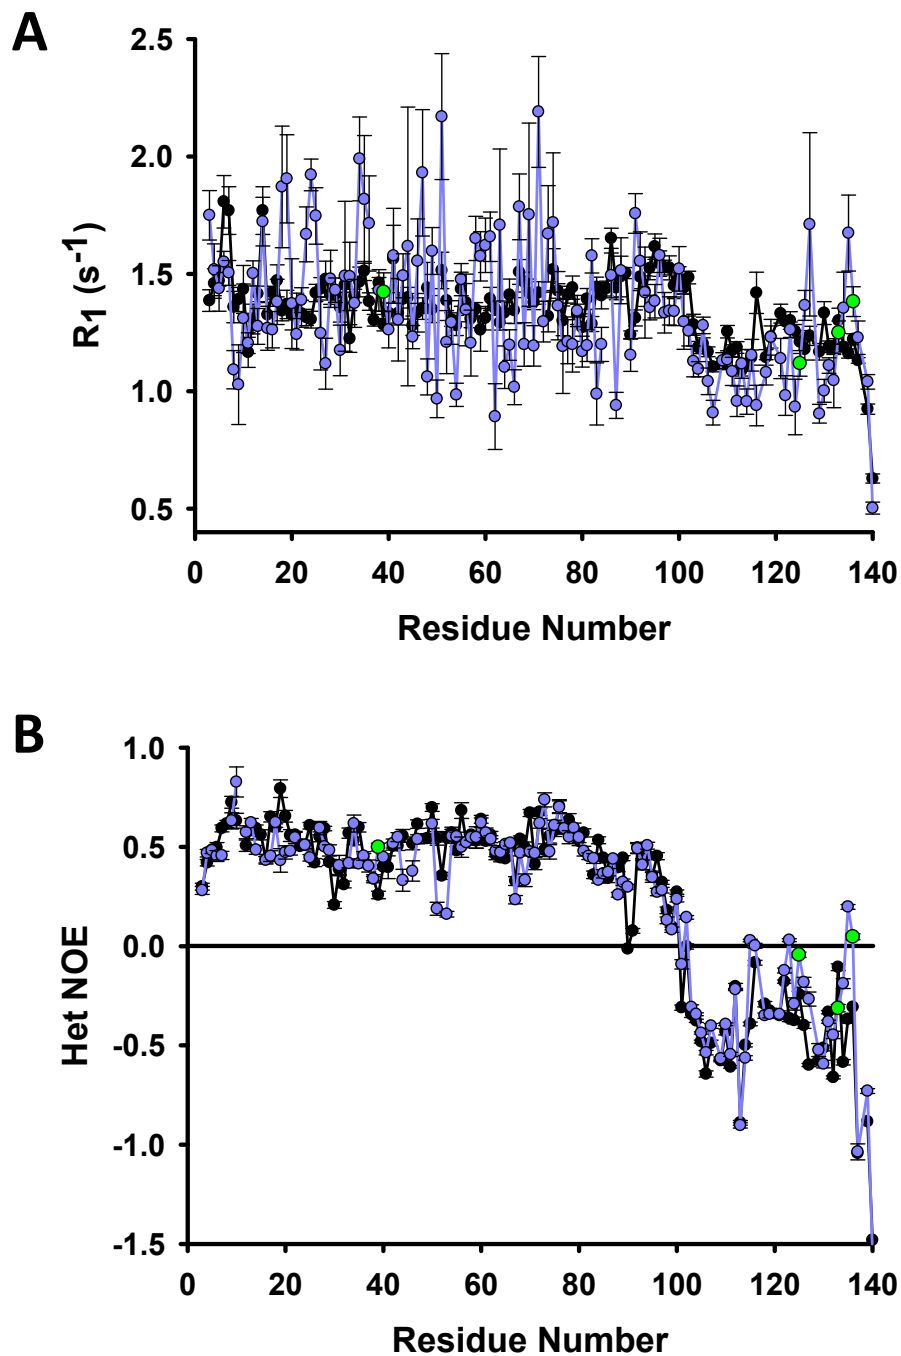

**Figure S13. Effect of Tyr nitration on the dynamics of SDS-bound  $\alpha$ S.** Plots of the  $R_1$  (s<sup>-1</sup>) (**A**) and Het-NOE (**B**) relaxation data obtained for  $\alpha$ S (**black**) and  $\alpha$ S-NO<sub>2</sub> (**purple**) in the presence of SDS micelles. The data corresponding to the different 3-NT moieties in  $\alpha$ S-NO<sub>2</sub> are colored in **green**. The relaxation measurements were carried out at 37 °C in 20 mM phosphate buffer (pH 6.5).

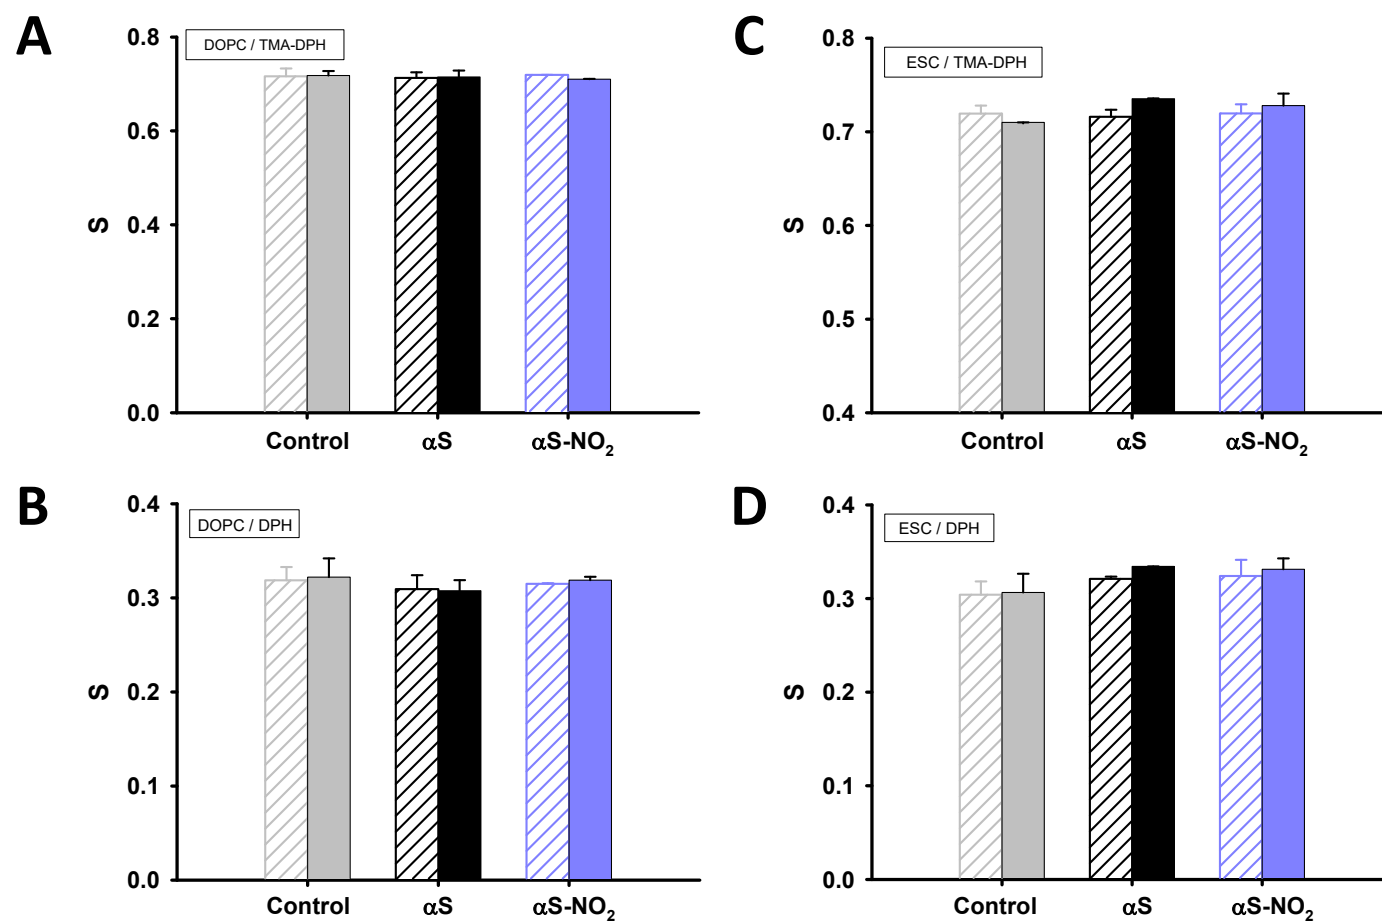

**Figure S14.** Lipid order parameters ( $S$ ) of DOPC-SUVs (130  $\mu$ M) (**A, B**) and ESC-SUVs (130  $\mu$ M) (**C, D**) in the absence (*grey*) or in the presence of  $\alpha$ S (*black*) and  $\alpha$ S-NO<sub>2</sub> (*purple*). SUVs were labelled with TMA-DPH (2  $\mu$ M) (**top; A, C**) and DPH (1  $\mu$ M) (**bottom; B, C**) probes. Empty bars correspond to samples before the protein addition. Full bars represent the  $S$  values of the different SUVs after the addition of  $\alpha$ S or  $\alpha$ S-NO<sub>2</sub> (13  $\mu$ M). Measurements were carried out in 20 mM phosphate buffer (pH 7.4) containing 150 mM NaCl at 25 °C.



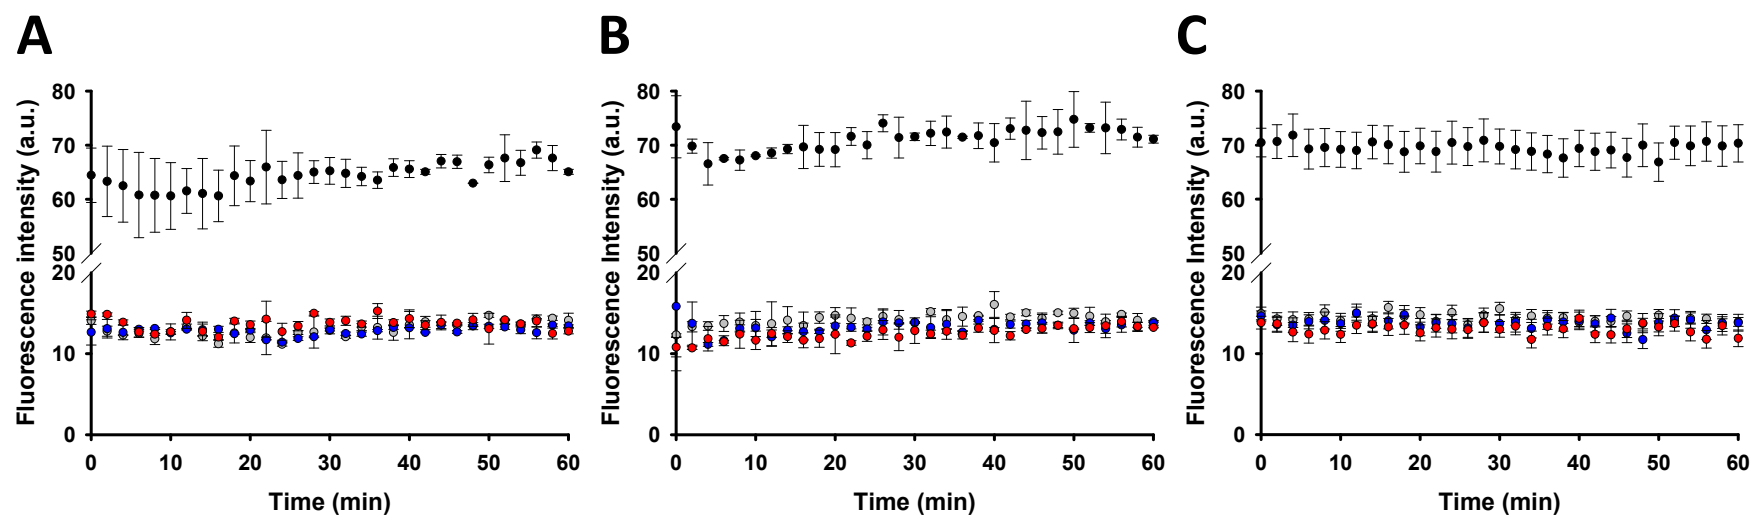

**Figure S15.** Calcein fluorescence intensity at 515 nm ( $\lambda_{\text{ex}}$  495 nm) obtained for solutions containing 130  $\mu\text{M}$  DOPC- **(A)**, DOPS- **(B)**, and ESC- **(C)** SUVs in the absence (*grey*) or in the presence of 13  $\mu\text{M}$   $\alpha\text{S}$  (*blue*), 13  $\mu\text{M}$   $\alpha\text{S-NO}_2$  (*red*), or 2 mM Triton X-100 detergent (used as the control; *black*). All the experiments were carried out in 20 mM phosphate buffer (pH 7.4) containing 150 mM NaCl at 25  $^{\circ}\text{C}$ .

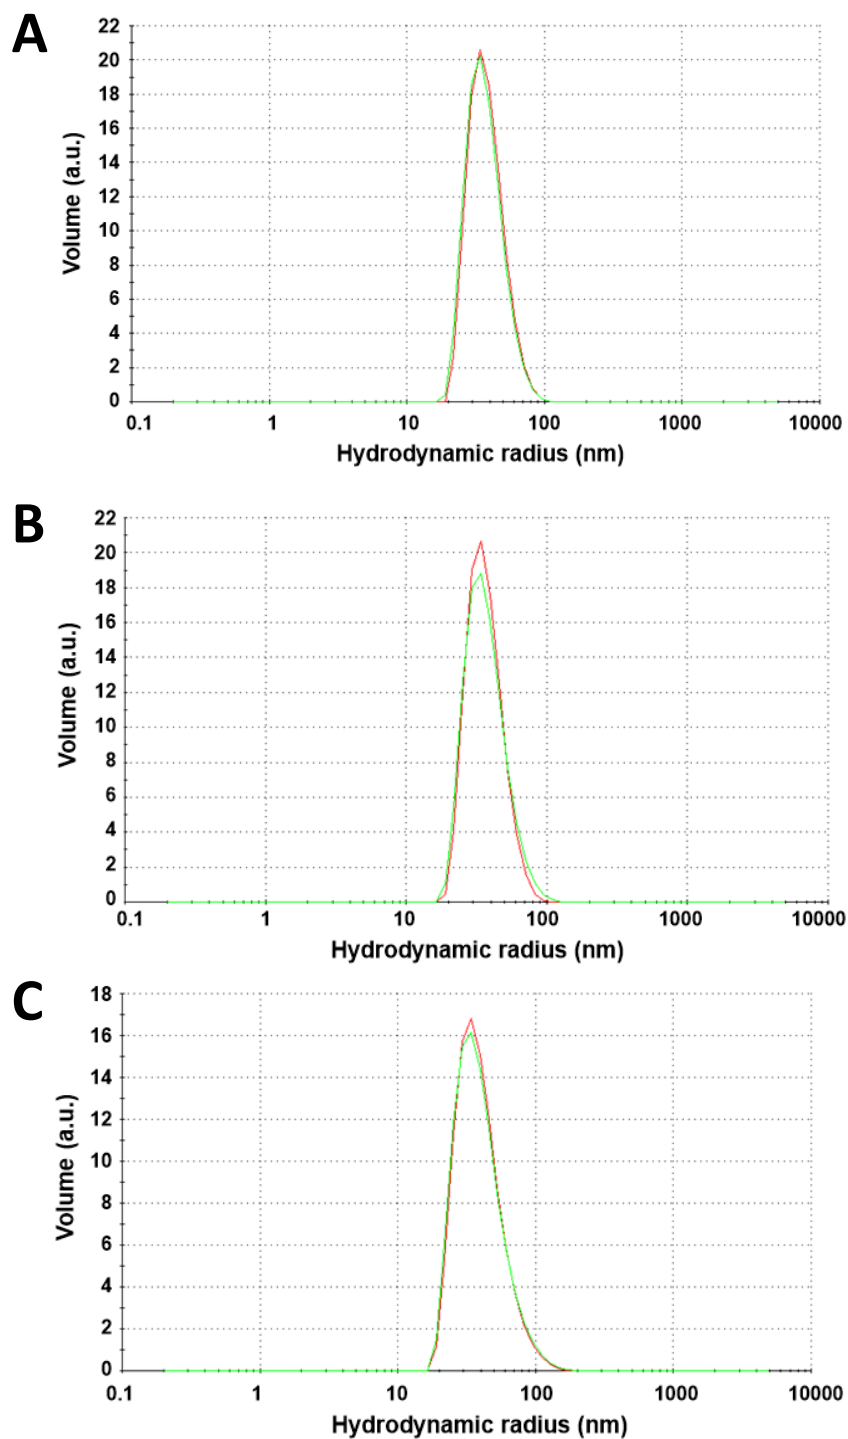

**Figure S16.** DLS size distribution profiles of solutions containing 130  $\mu\text{M}$  DOPS- **(A)**, ESC- **(B)**, and DOPC-SUVs **(C)** before (*red*) and after (*green*) 96 h of incubation. Measurements were carried out in a 20 mM phosphate buffer (pH 7.4) containing 150 mM NaCl and at 25  $^{\circ}\text{C}$ .

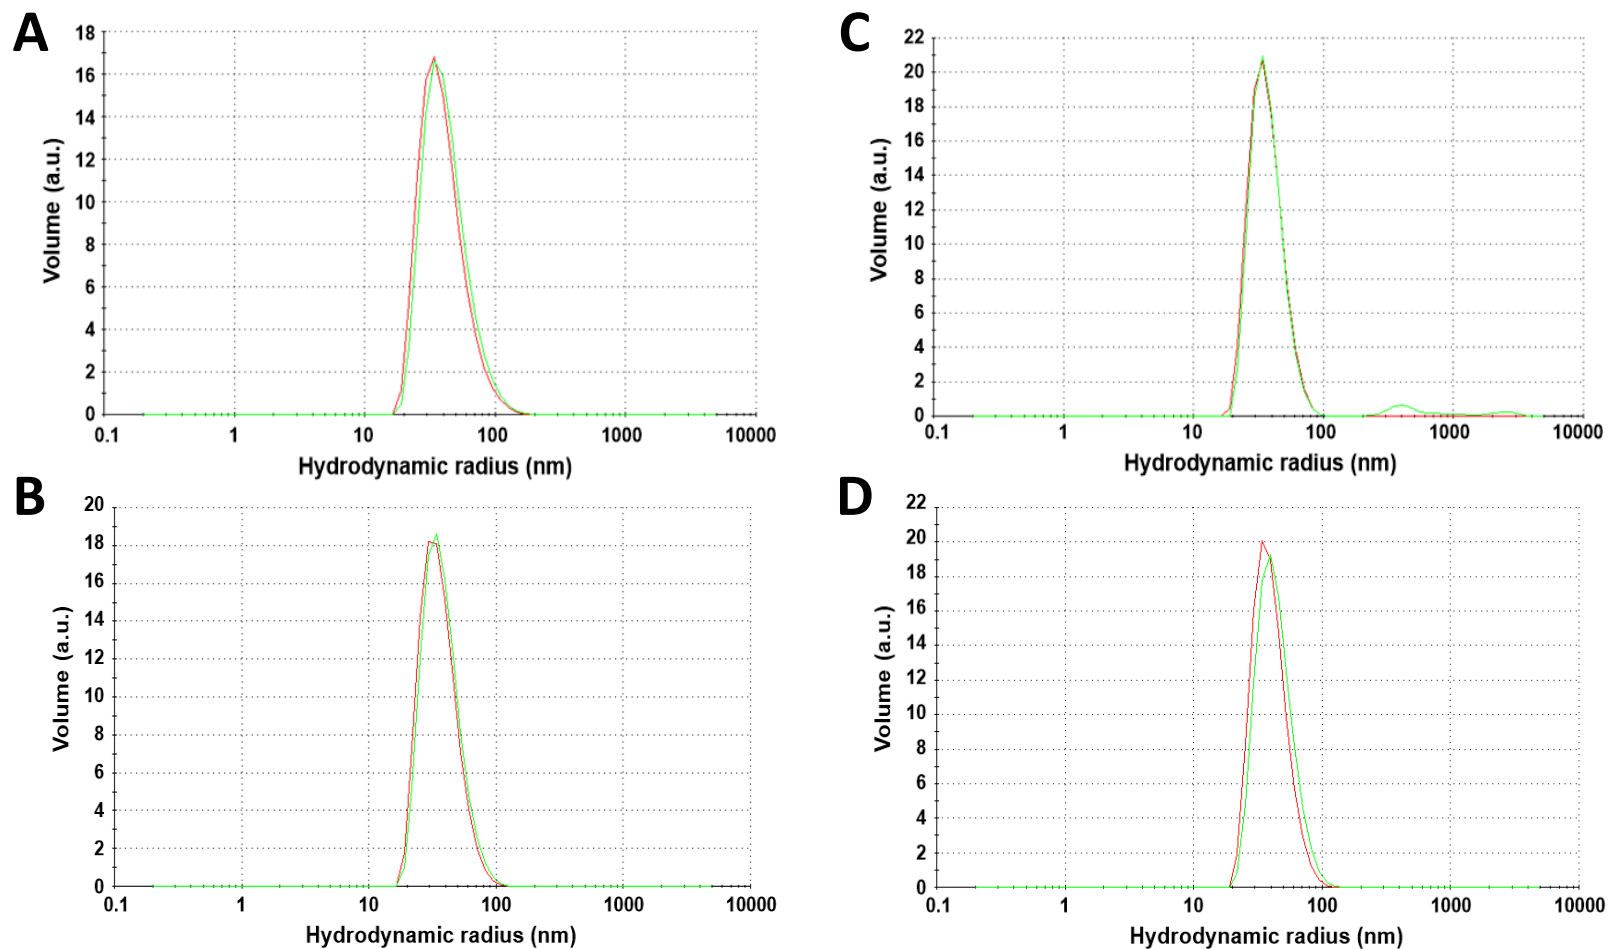

**Figure S17.** DLS size distribution profiles of solutions containing 130  $\mu\text{M}$  DOPC- (**A, B**) or ESC- (**C, D**) SUVs before (**red**) and after (**green**) 96 h of incubation in the presence of 13  $\mu\text{M}$   $\alpha\text{S}$  (**top; A, C**) or  $\alpha\text{S-NO}_2$  (**bottom; B, D**). Measurements were carried out in 20 mM phosphate buffer (pH 7.4) containing 150 mM NaCl at 25  $^{\circ}\text{C}$ .

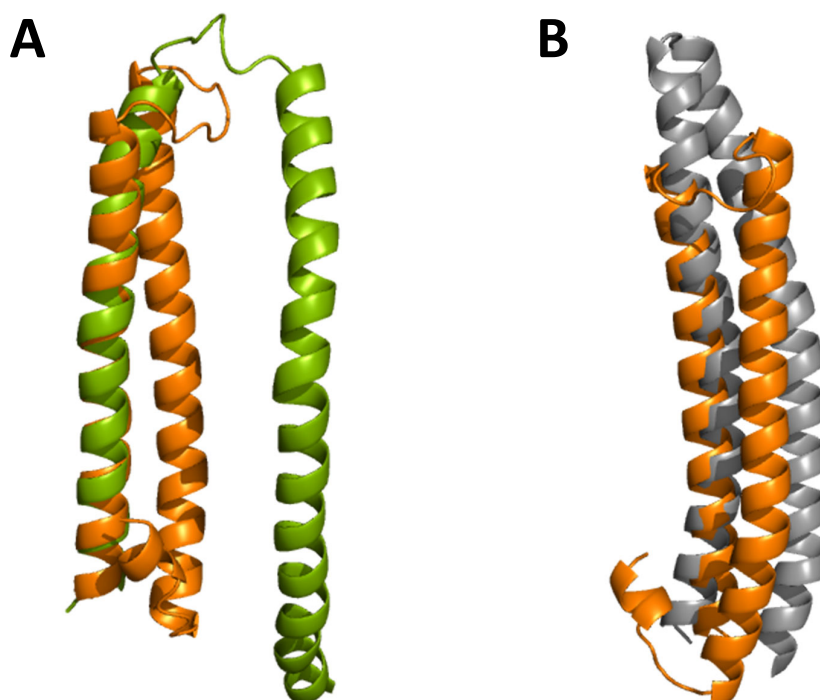

**Figure S18.** CS-Rosetta structural models of the SDS-bound  $\alpha$ S-NO<sub>2</sub>. **(A)** Structural alignment of the V3-E35 region corresponding to the NMR solution structure of the SDS-bound  $\alpha$ S (PDB: 1XQ8; [2]) (*green*) onto the same stretch of the lowest-energy CS-Rosetta model obtained for the SDS-bound  $\alpha$ S-NO<sub>2</sub> (*orange*). **(B)** Structural alignment of the V3-E35 region corresponding to the NMR solution structure of the SDS-bound  $\alpha$ S [3] (*grey*) onto the same stretch of the lowest-energy CS-Rosetta model obtained for the SDS-bound  $\alpha$ S-NO<sub>2</sub> (*orange*).

### 3. Supplementary Tables

**Table S1.** Structural statistics for the calculations of the  $\alpha$ S-NO<sub>2</sub> structure in the presence of SDS. Statistics were calculated for the 10 lowest-energy structures after water refinement.

| Final NMR restraints                                                                                                                    |                 | 985             |
|-----------------------------------------------------------------------------------------------------------------------------------------|-----------------|-----------------|
| Short-range                                                                                                                             | $(i-j) \leq 1$  | 712             |
| Medium-range                                                                                                                            | $1 < (i-j) < 5$ | 244             |
| Long-range                                                                                                                              | $(i-j) \geq 5$  | 29              |
| Dihedral angle ( $\Phi$ ) constraints <sup>a</sup>                                                                                      |                 | 133             |
| Dihedral angle ( $\Psi$ ) constraints <sup>a</sup>                                                                                      |                 | 131             |
| Restraint statistics <sup>b</sup>                                                                                                       |                 |                 |
| Distance violations $> 0.0$ Å                                                                                                           |                 | 0               |
| Torsion angle violations $> 0^\circ$                                                                                                    |                 | 0               |
| Pairwise RMSD of residues D2-G41 in Å <sup>c</sup>                                                                                      |                 |                 |
| Backbone N, Ca, CO                                                                                                                      |                 | $1.82 \pm 0.76$ |
| Heavy atoms                                                                                                                             |                 | $2.52 \pm 0.71$ |
| Ramachandran plot <sup>d</sup>                                                                                                          |                 |                 |
| Most-favored regions (%)                                                                                                                |                 | 97.4            |
| Additional allowed regions (%)                                                                                                          |                 | 2.6             |
| Generously allowed regions (%)                                                                                                          |                 | 0.0             |
| Disallowed regions (%)                                                                                                                  |                 | 0.0             |
| <sup>a</sup> Derived from Preditor.                                                                                                     |                 |                 |
| <sup>b</sup> Violations are only reported when present in five or more structures.                                                      |                 |                 |
| <sup>c</sup> Coordinate precision is given as the average pairwise Cartesian coordinate root-mean-squared deviations over the ensemble. |                 |                 |
| <sup>d</sup> Values obtained from the PROCHECK-NMR analysis [4] by using the Protein Structure Validation Server (PSVS) [5].            |                 |                 |

**Table S2.** Hydrodynamic radius data (nm) from DLS size measurements of 130  $\mu$ M DOPS-, ESC-, and DOPC-SUVs incubated during 96 h in the absence (control) or in the presence of 13  $\mu$ M  $\alpha$ S or  $\alpha$ S-NO<sub>2</sub>.

| SUVs' composition          | DOPC              | DOPS                                                                          | ESC                                                                              |
|----------------------------|-------------------|-------------------------------------------------------------------------------|----------------------------------------------------------------------------------|
| Control                    | $52.85 \pm 25.17$ | $45.64 \pm 14.17$                                                             | $45.64 \pm 16.84$                                                                |
| $\alpha$ S                 | $52.85 \pm 24.07$ | $39.41 \pm 8.65$ (74%)<br>$307.6 \pm 91.5$ (22.2%)<br>$2780 \pm 165.9$ (3.3%) | $39.41 \pm 12.62$ (95.8%)<br>$553.2 \pm 339.5$ (3.3%)<br>$2780 \pm 367.8$ (0.9%) |
| $\alpha$ S-NO <sub>2</sub> | $45.64 \pm 17.04$ | $52.85 \pm 17.32$                                                             | $52.85 \pm 16.75$                                                                |

## **4. References associated with the Supplementary Information**

1. Lange OF, Rossi P, Sgourakis NG, Song Y, Lee HW, Aramini JM, Ertekin A, Xiao R, Acton TB, Montelione GT, Baker D (2012) Determination of solution structures of proteins up to 40 kDa using CS-Rosetta with sparse NMR data from deuterated samples. *Proc Natl Acad Sci USA* 109:10873-10878. <https://doi.org/10.1073/pnas.1203013109>.
2. Ulmer TS, Bax A, Cole NB, Nussbaum RL (2005) Structure and dynamics of micelle-bound human alpha-synuclein. *J Biol Chem* 280:9595-9603. <https://doi.org/10.1074/jbc.M411805200>.
3. Uceda AB, Frau J, Vilanova B, Adrover M (2022) Glycation of  $\alpha$ -synuclein hampers its binding to synaptic-like vesicles and its driving effect on their fusion. *Cell Mol Life Sci* 79: 342. <https://doi.org/10.1007/s00018-022-04373-4>.
4. Laskowski RA, Rullmann JA, MacArthur MW, Kaptein R, Thornton JM (1996) AQUA and PROCHECK-NMR: programs for checking the quality of protein structures solved by NMR. *J Biomol NMR* 8:477-86. <https://doi.org/10.1007/BF00228148>.
5. Bhattacharya A, Tejero R, Montelione GT (2007) Evaluating protein structures determined by structural genomics consortia. *Proteins* 66:778-95. <https://doi.org/10.1002/prot.21165>.
